# Supplementary material
Source: PubMed Central journal article supplement (PMC3736614)
Supplement: NIHMS494907-supplement-supple.pdf [file NIHMS494907-supplement-supple.pdf]

# Supplementary Figure 1

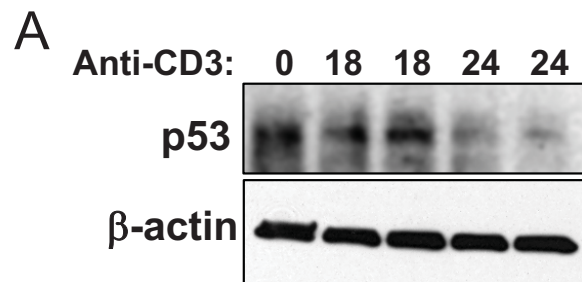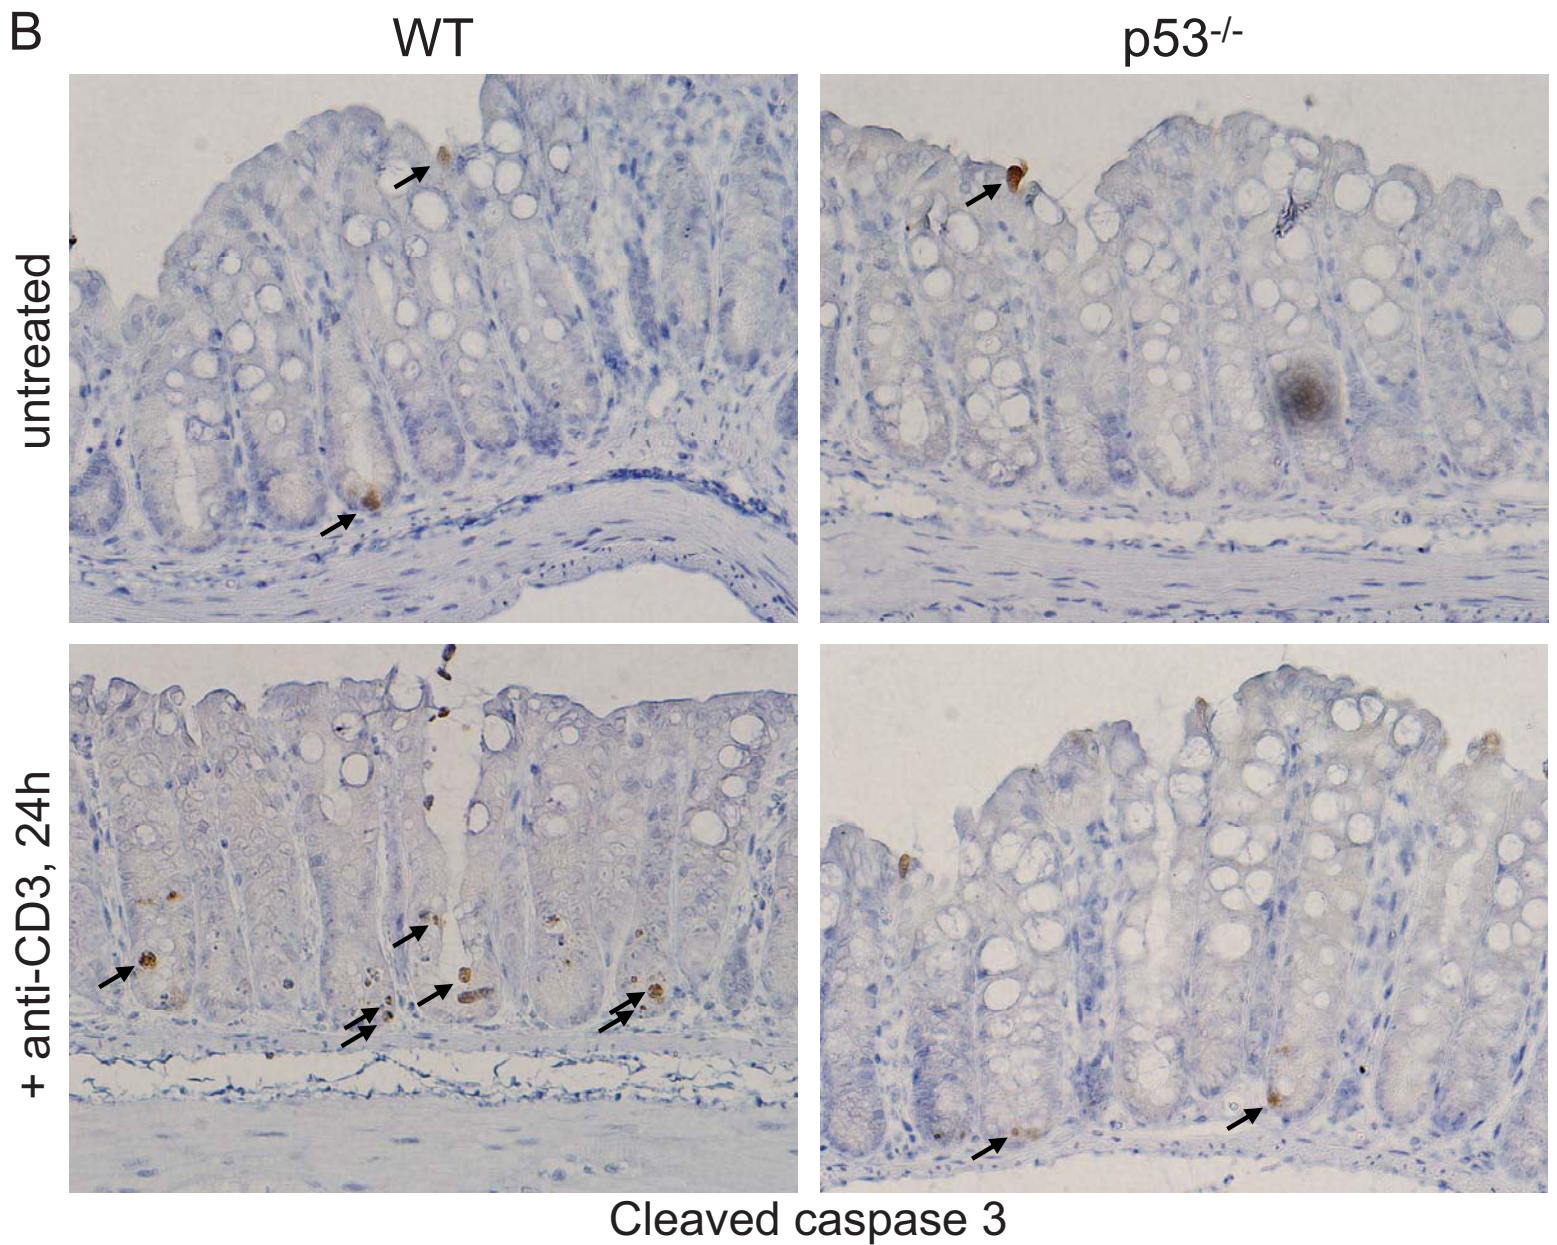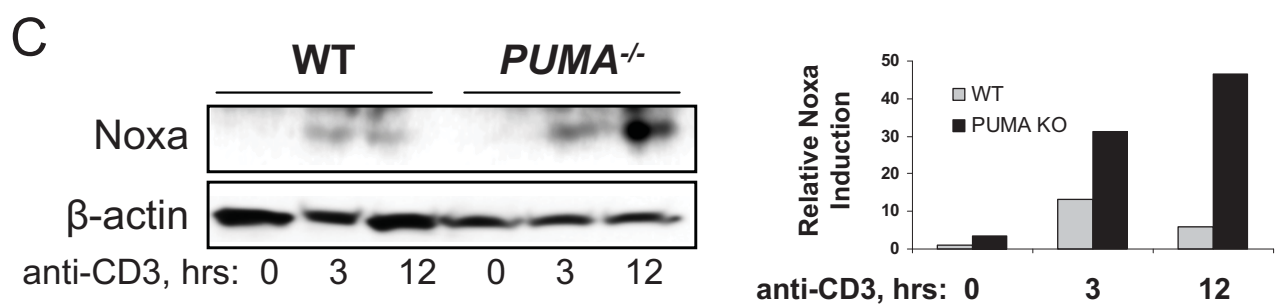

Cytokine mRNA levels in WT and *p53*<sup>-/-</sup> mice.

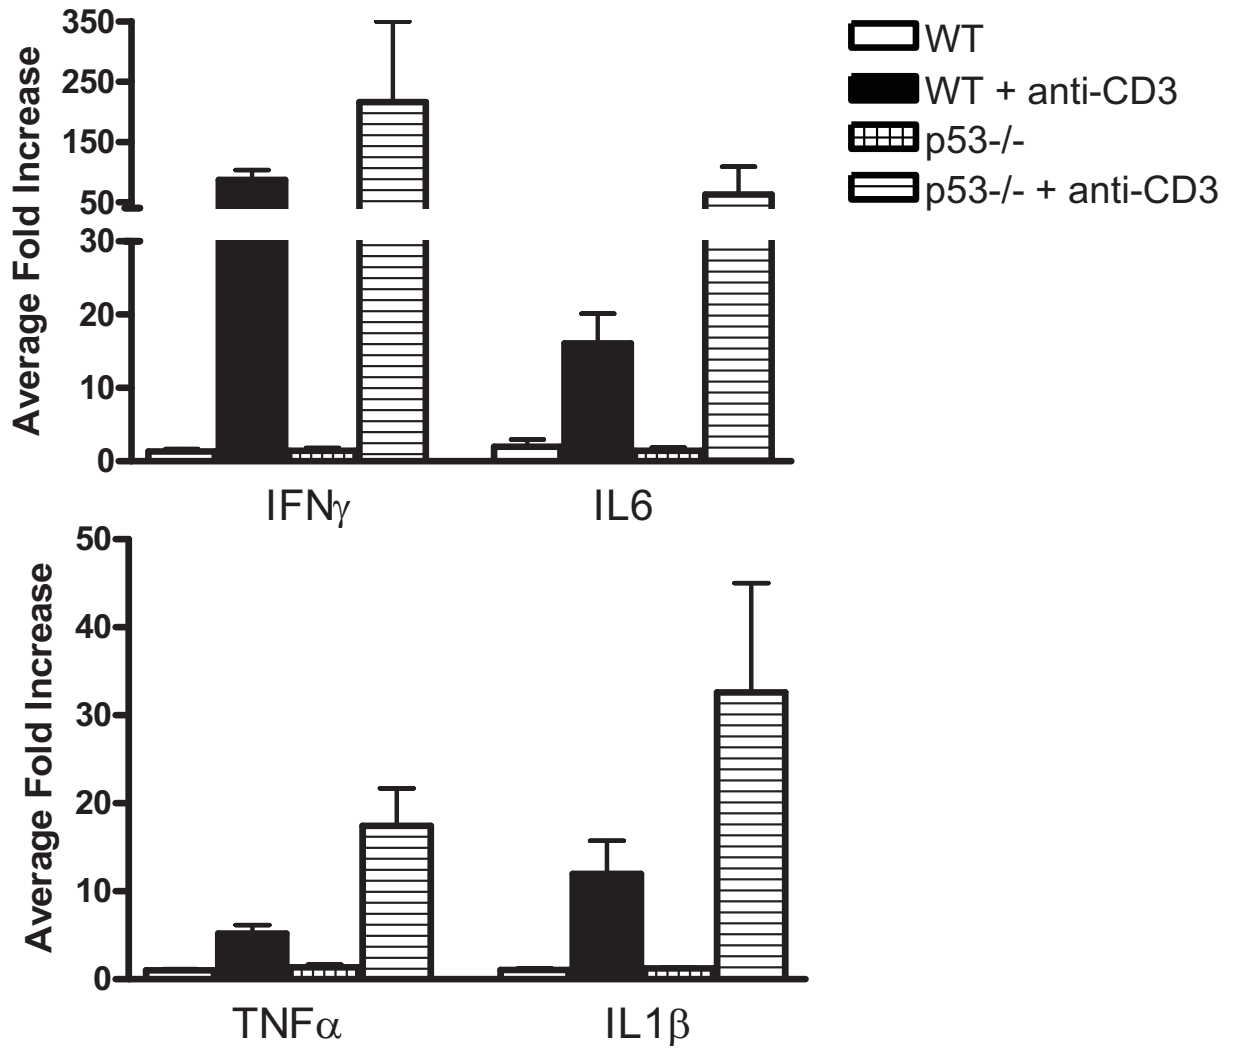

# Supplementary Figure 3

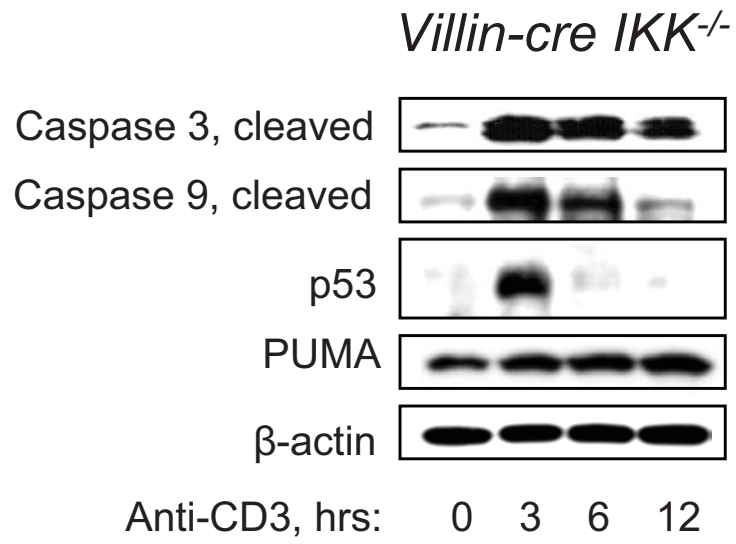

**Supplementary Figure 1.** (A) Western blot for p53 protein in colon intestinal epithelial cells (*IEC*) at 0, 18, and 24 hours after T-cell activation by anti-CD3 treatment.  $\beta$ -actin was used as a loading control. Membranes were exposed for a longer time than in Figure 1A to detect low levels of p53 at later time points and at baseline. (B) Immunohistochemistry for cleaved caspase 3 in colon tissue sections from wild-type (*WT*) and *p53*<sup>-/-</sup> mice that were left untreated or were killed 24 hours after anti-CD3 treatment. (C) Western blotting for Noxa in *WT* and p53 up-regulated modulator of apoptosis (*PUMA*)<sup>-/-</sup> mice at 0, 3, and 12 hours after treatment. Densitometry data show Noxa induction over time with T-cell activation relative to control untreated mice and normalized to actin.  $\beta$ -actin was used as a loading control.

**Supplementary Figure 2.** Inflammatory cytokines following T-cell activation in wild-type (*WT*) and *p53*<sup>-/-</sup> mice. RNA isolated from 1-cm pieces of the distal colon from *WT* and *p53*<sup>-/-</sup> mice at 0 or 3 hours after anti-CD3 injection was reverse transcribed and used for real-time polymerase chain reaction analysis. The induction of the inflammatory cytokines tumor necrosis factor, interferon  $\gamma$ , interleukin (IL)-6, and IL-1 $\beta$  was assessed. The data represent 8 *WT*, 7 *WT* + anti-CD3, 5 *p53*<sup>-/-</sup>, and 3 *p53*<sup>-/-</sup> + anti-CD3 mice.

**Supplementary Figure 3.** Apoptosis in *Villin-cre IKK*<sup>-/-</sup> mice colon intestinal epithelial cells. Western blots showing caspases 3 and 9 activation and p53 and p53 up-regulated modulator of apoptosis (*PUMA*) expression at the indicated time after T-cell activation by anti-CD3 injection of the mice.  $\beta$ -actin was used as a loading control.
